# Supplementary material
Source: PubMed Central journal article supplement (PMC3643517)

Type of file: figure

Label: Figure 2

Filename: Anderson Supplementary Figure 2.jpg

**A**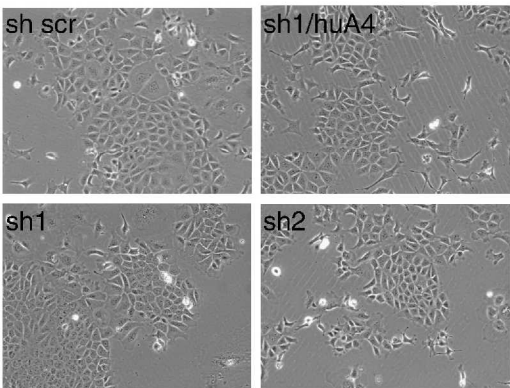**B**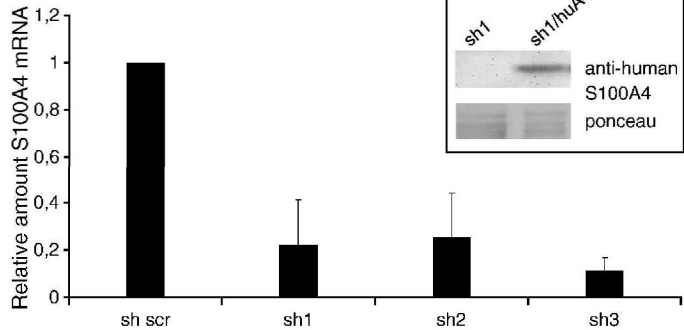**C**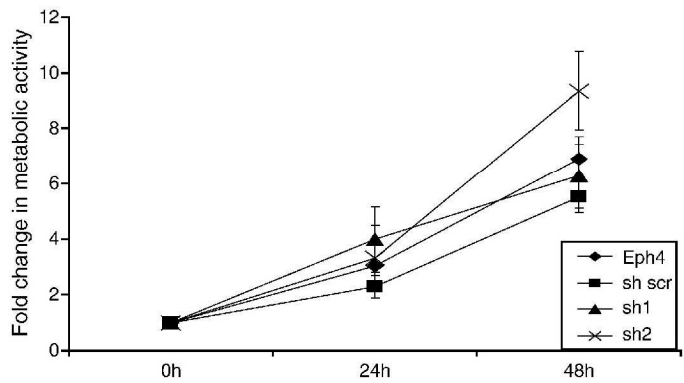

Type of file: figure

Label: Figure 3

Filename: Anderson Supplementary Figure 3.jpg

Control without  
primary  
antibody

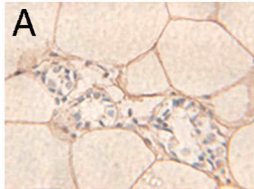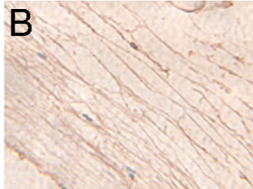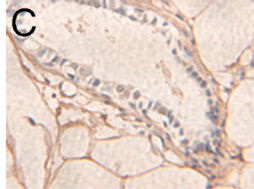

Anti S100A4  
antibody

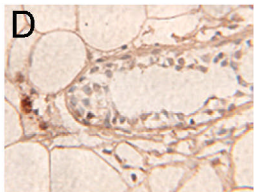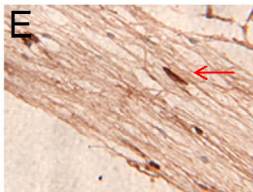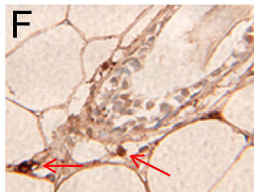

Supplement: NIHMS275722-supplement-02.pdf [file NIHMS275722-supplement-02.pdf]
